# Supplementary material for: Rickettsial seropositivity in the indigenous community and animal farm workers, and vector surveillance in Peninsular Malaysia
Source: PubMed Central journal article supplement (PMC5457682; doi:10.1038/emi.2017.4), 2017-04-12
Supplement: emi20174x2.pdf [file emi20174x2.pdf]

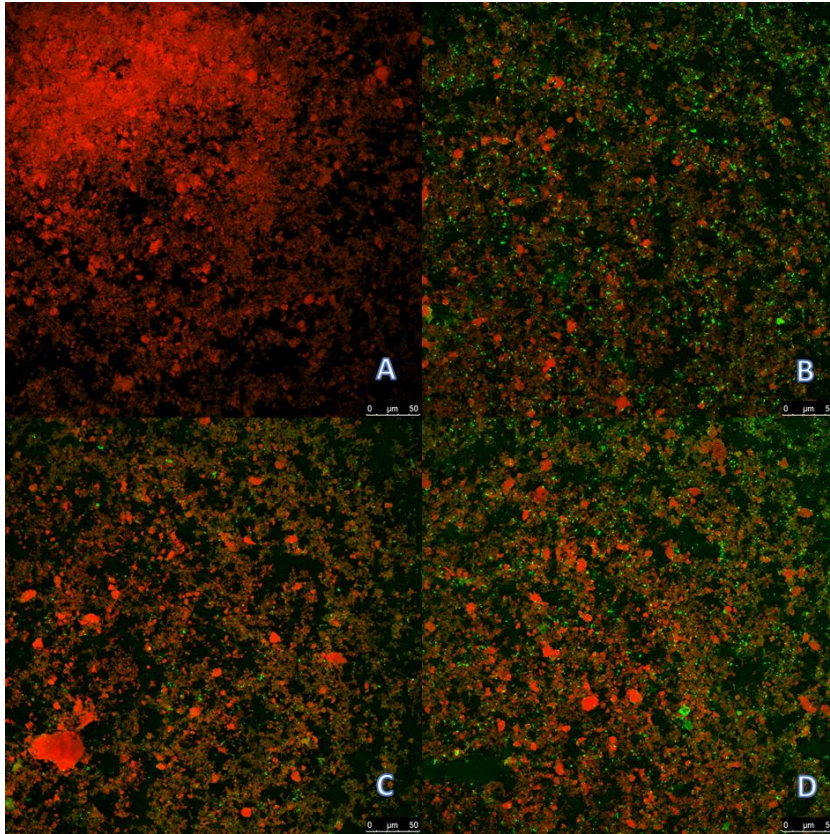

**Supplementary Figure S2** Representative images of *R. felis* immunofluorescence assay (Fuller Laboratories, USA). **(A)** Negative control, **(B)** Positive control, **(C)** positive sample from farm worker, and **(D)** positive sample from rural villager. Analysis was performed in a Leica TCS SP5 II laser scanning confocal spectral microscope with a 40x oil immersion objective lens. Scale bar: 50  $\mu\text{m}$ .
